# MIND TO MIND

Creative writing that explores the abstract side of our profession and our lives

*Stephen T. Harvey, M.D., Editor*

## On the Death of a Tooth

James W. Gaynor

For Nazia M. Ahmed, D.D.S., F.A.G.D.

We have been together my lower left canine and I  
for more than 50 years but there is no ceremony  
to help the aging mourn the imminent loss of a tooth  
and there should be because we shared countless meals

appearing together in hundreds of smiling photographs  
but no one seems to understand the pain now  
present and psychological which has migrated from my jaw  
to my left ear so here I am wounded warrior

breathing in the surgeon's welcome mist  
trying to remember how did I get to where I am  
which according to my mother whose version of history  
was at times fanciful her side left Scotland in 17-something

before the English could kill them settling in upstate New York  
where most of them but not all died in an Indian attack  
and my father's family left Dublin in 1863  
before the English could kill them arriving in New York City

just in time for the Draft Riots so someone said  
let's lose the Irish O and nobody got shot which  
is how I got here counting back contemplating lack  
of consoling ritual to mark the death of a tooth and

how it's all about years and years of migrating pain

This poem is one of the finalists of ANESTHESIOLOGY's 2019 annual creative writing competition, The Letheon. JamesWGaynor@hotmail.com.

Accepted for publication March 4, 2020. Published online first on April 3, 2020.

Permission to reprint granted to the American Society of Anesthesiologists, Inc. by copyright author/owner. Anesthesiology 2020; 132:1585. DOI: 10.1097/ALN.0000000000003290
